# Supplementary material for: Adherence to Dietary and Lifestyle Recommendations and Prostate Cancer Risk in the Prostate Testing for Cancer and Treatment (ProtecT) Trial
Source: Oxford University Press journal article supplement (doi:10.1158/1055-9965.epi-14-0322), 2014-07-13
Supplement: 10559965epi140322-sup-128502_2_supp_2515190_n71tm2.docx [file 10559965epi140322-sup-128502_2_supp_2515190_n71tm2.docx]

**Supplementary Figure 1. Flow chart of exclusions and final dataset of study population**

Eligible for analysis

2,131 Cases

14,169 Controls

Missing exposure variables and confounding factors

325 Cases

2,165 Control

Main analysis with complete data

1,806 Cases

12,005 Controls

Case control series

2,939 Cases

20,781 Controls

Did not return FFQ

808 Cases

6,612 Controls

Extreme energy intake

39 Cases

263 Controls
