# Supplementary material for: Adherence to Dietary and Lifestyle Recommendations and Prostate Cancer Risk in the Prostate Testing for Cancer and Treatment (ProtecT) Trial
Source: Oxford University Press journal article supplement (doi:10.1158/1055-9965.epi-14-0322), 2014-07-13
Supplement: 10559965epi140322-sup-128502_2_supp_2517121_n73wlk.docx [file 10559965epi140322-sup-128502_2_supp_2517121_n73wlk.docx]

**Supplementary Table 1.** Baseline characteristics of controls by WCRF/AICR index score

| Characteristics | WCRF/AICR Index Score | | | | |
| --- | --- | --- | --- | --- | --- |
| All | Quantile 1 | Quantile 2 | Quantile 3 | Quantile 4 |
| Score range | 0-6 | 0-2 | >2 to <3 | 3 to <4 | 4-6 |
| No. of controls | 12,005 | 1,983 | 3,178 | 4,658 | 2,186 |
|  |  |  |  |  |  |
| Age (years) | 61.6 ± 5.0 | 60.6 ± 5.0 | 61.1 ± 5.0 | 62.0 ± 4.9 | 62.4 ± 4.8 |
| BMI (kg/m2) | 27.4 ± 3.9 | 29.3 ± 4.2 | 28.1 ± 3.9 | 27.0 ± 3.6 | 25.5 ± 3.2 |
| Total energy intake (kcal/d) | 2408 ± 681 | 2471 ± 663 | 2446 ± 702 | 2394 ± 676 | 2324 ± 668 |
|  |  |  |  |  |  |
| Ethnicity (%) |  |  |  |  |  |
| White | 98.7 | 99.1 | 98.9 | 98.7 | 97.8 |
| Others | 0.7 | 0.2 | 0.5 | 0.7 | 1.7 |
| Missing | 0.6 | 0.7 | 0.6 | 0.6 | 0.5 |
| Family history of prostate cancer (%) |  |  |  |  |  |
| Yes | 5.4 | 5.0 | 5.0 | 5.9 | 5.2 |
| No | 84.4 | 83.8 | 84.4 | 84.3 | 85.0 |
| Missing | 10.2 | 11.2 | 10.6 | 9.8 | 9.8 |
| Diabetes (%) |  |  |  |  |  |
| Yes | 7.2 | 6.7 | 7.8 | 7.1 | 7.1 |
| No | 87.1 | 87.6 | 86.4 | 87.2 | 87.5 |
| Missing | 5.7 | 5.7 | 5.8 | 5.7 | 5.4 |
| Occupational class (%) |  |  |  |  |  |
| Managerial | 48.5 | 43.9 | 46.2 | 49.1 | 54.4 |
| Intermediate | 15.1 | 15.7 | 15.6 | 14.8 | 14.5 |
| Routine | 34.8 | 39.0 | 36.2 | 34.6 | 29.5 |
| Missing | 1.6 | 1.4 | 2.0 | 1.5 | 1.6 |
| Smoking status (%) |  |  |  |  |  |
| Never | 34.4 | 24.1 | 30.2 | 36.5 | 45.5 |
| Past | 52.0 | 55.1 | 54.3 | 51.5 | 46.7 |
| Current | 13.2 | 20.3 | 15.1 | 11.7 | 7.3 |
| Missing | 0.4 | 0.5 | 0.4 | 0.3 | 0.5 |
