# Supplementary material for: Adherence to Dietary and Lifestyle Recommendations and Prostate Cancer Risk in the Prostate Testing for Cancer and Treatment (ProtecT) Trial
Source: Oxford University Press journal article supplement (doi:10.1158/1055-9965.epi-14-0322), 2014-07-13
Supplement: 10559965epi140322-sup-128502_2_supp_2517125_n73wtw.docx [file 10559965epi140322-sup-128502_2_supp_2517125_n73wtw.docx]

**Supplementary Table 2. Associations of the components of WCRF/AICR index and prostate cancer risk by cancer grade.a**

| WCRF/AICR index components | Score | Control  n | Low Grade | | | High Grade | | | High vs Low | |
| --- | --- | --- | --- | --- | --- | --- | --- | --- | --- | --- |
| n | OR (95% CI) | *P*trend*d* | n | OR (95% CI) | *P*trend | OR (95% CI) | *P*trend |
| Body Fatness | 0 to 0.25 | 5,007 | 492 | 1 |  | 253 | 1 |  | 1 |  |
| 0.5 | 2,928 | 300 | 1.02 (0.88, 1.19) |  | 146 | 0.99 (0.80, 1.22) |  | 0.95 (0.73, 1.23) |  |
| 0.75 | 1,998 | 199 | 0.99 (0.83, 1.17) |  | 93 | 0.92 (0.72, 1.17) |  | 0.90 (0.67, 1.22) |  |
| 1 | 2,072 | 213 | 1.01 (0.85, 1.19) |  | 104 | 1.00 (0.78, 1.26) |  | 0.95 (0.71, 1.27) |  |
|  | Dose-responseb |  |  | 1.01 (0.97, 1.06) | 0.67 |  | 1.00 (0.94, 1.07) | 0.98 | 0.98 (0.91, 1.06) | 0.61 |
|  |  |  |  |  |  |  |  |  |  |  |
| Physical activity | 0 | 4,796 | 457 | 1 |  | 231 | 1 |  | 1 |  |
| 0.5 | 3,956 | 418 | 1.11 (0.96, 1.28) |  | 189 | 1.00 (0.82, 1.23) |  | 0.86 (0.67, 1.10) |  |
| 1 | 3,253 | 329 | 1.07 (0.92, 1.25) |  | 176 | 1.12 (0.91, 1.38) |  | 1.06 (0.82, 1.37) |  |
|  | Dose-responsec |  |  | 1.04 (0.96, 1.12) | 0.33 |  | 1.06 (0.95, 1.17) | 0.30 | 1.02 (0.90, 1.16) | 0.75 |
|  |  |  |  |  |  |  |  |  |  |  |
| Foods and drinks that promote weight gain | 0 to 0.25 | 2,948 | 295 | 1 |  | 140 | 1 |  | 1 |  |
| 0.5 | 4,005 | 415 | 1.04 (0.88, 1.21) |  | 191 | 0.99 (0.79, 1.24) |  | 0.91 (0.69, 1.20) |  |
| 0.75 | 3,890 | 399 | 1.04 (0.88, 1.22) |  | 206 | 1.09 (0.87, 1.36) |  | 1.01 (0.77, 1.34) |  |
| 1 | 1,162 | 95 | 0.84 (0.66, 1.08) |  | 59 | 1.07 (0.78, 1.49) |  | 1.26 (0.83, 1.90) |  |
|  | Dose-responseb |  |  | 0.98 (0.92, 1.04) | 0.55 |  | 1.05 (0.96, 1.14) | 0.28 | 1.06 (0.95, 1.18) | 0.27 |
|  |  |  |  |  |  |  |  |  |  |  |
| Plant foods | 0 to 0.25 | 1,063 | 101 | 1 |  | 63 | 1 |  | 1 |  |
| 0.5 | 2,456 | 273 | 1.14 (0.90, 1.45) |  | 124 | 0.71 (0.43, 1.18) |  | 0.66 (0.34, 1.27) |  |
| 0.75 | 2,547 | 265 | 1.04 (0.81, 1.34) |  | 137 | 0.76 (0.45, 1.27) |  | 0.78 (0.40, 1.53) |  |
| 1 | 5,939 | 565 | 0.93 (0.73, 1.18) |  | 272 | 0.64 (0.38, 1.07) |  | 0.76 (0.39, 1.37) |  |
|  | Dose-responseb |  |  | 0.94 (0.89, 1.00) | 0.07 |  | 0.93 (0.85, 1.01) | 0.09 | 1.00 (0.90, 1.11) | 0.95 |
|  |  |  |  |  |  |  |  |  |  |  |
| Animal foods | 0 | 8,277 | 817 | 1 |  | 410 | 1 |  | 1 |  |
| 0.5 | 3,129 | 344 | 1.11 (0.97, 1.28) |  | 164 | 1.04 (0.86, 1.26) |  | 0.96 (0.76, 1.22) |  |
| 1 | 599 | 43 | 0.73 (0.53, 1.00) |  | 22 | 0.74 (0.48, 1.16) |  | 1.07 (0.62, 1.84) |  |
|  | Dose-responsec |  |  | 0.99 (0.88, 1.10) | 0.77 |  | 0.96 (0.82, 1.11) | 0.57 | 0.99 (0.82, 1.20) | 0.93 |
|  |  |  |  |  |  |  |  |  |  |  |
| Alcohol | 0 | 3,745 | 359 | 1 |  | 197 | 1 |  | 1 |  |
| 0.5 | 1,788 | 185 | 1.07 (0.89, 1.29) |  | 73 | 0.78 (0.59, 1.03) |  | 0.75 (0.53, 1.05) |  |
| 1 | 6,472 | 660 | 1.04 (0.90, 1.20) |  | 326 | 0.95 (0.78, 1.14) |  | 0.93 (0.73, 1.17) |  |
|  | Dose-responsec |  |  | 1.02 (0.95, 1.09) | 0.62 |  | 0.98 (0.89, 1.08) | 0.70 | 0.97 (0.87, 1.09) | 0.66 |

a Adjusted for age (continuous variable), recruitment centre, family history of prostate cancer, smoking status and total energy intake (kcal/d). All components were mutually adjusted for each other except for the ‘foods and drinks that promote weight gain’ component. b Odds ratios and 95% CI per 0.25 score increment. c Odds ratios and 95% CI per 0.5 score increment.  d P-values for trend were calculated by modeling components of WCRF/AICR score as a continuous variable.
